# Supplementary material for: Quantitative SERRS immunoassay for the detection of human PSA
Source: Royal Society of Chemistry journal article supplement (doi:10.1039/b902174d), 2009-01-01
Supplement: b902174d.pdf [file b902174d.pdf]

## Quantitative SERRS immunoassay for the detection of human PSA

Ross Stevenson, Andrew Ingram, Donald C McMillan and Duncan Graham

### Comparison of ratio gold:ABTS and quenching analysis

For analysis, 4ng of streptavidin HRP was added to the necessary wells in a 96-well plate before addition of 100 $\mu$ l ABTS. The reaction was followed for 30 minutes, upon completion the reaction was either quenched with 1% SDS before the addition to gold, or an unquenched sample was added directly to gold. All reactions were carried out in a total volume 300 $\mu$ l and the ratio of gold colloid:ABTS was varied for optimal results.

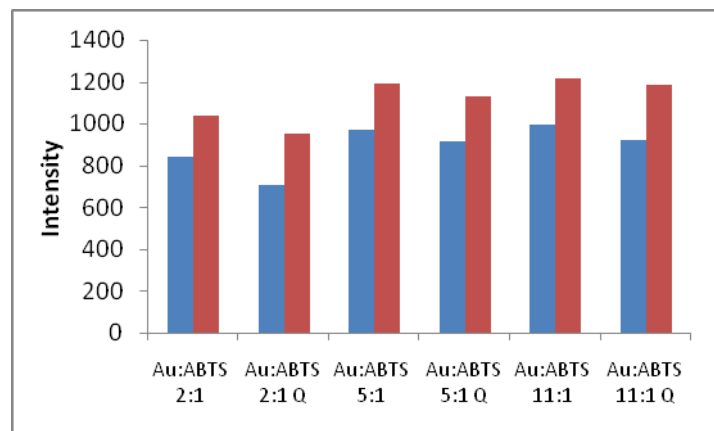

Figure S1. Red bars indicate peak maxima at 1405 $\text{cm}^{-1}$ , blue 1442 $\text{cm}^{-1}$ . The quenched (Q) and unquenched are shown, quenching appears to have little effect on the SERRS analysis of ABTS

### pH analysis

The pH was varied between 3.5 and 6.5 to find the optimal to carry out the experiment. Results are shown in Figure S2. 100 $\mu$ l of ABTS was incubated with HRP (4ng) for 30minutes. The ABTS was immediately added to 200 $\mu$ l gold solution and the SERRS was obtained at 514,5nm.

To obtain the maximum possible signal a pH between 4.5 and 5.0 should be used but the data suggests that the pH can be varied between 3.5 to 5.5.

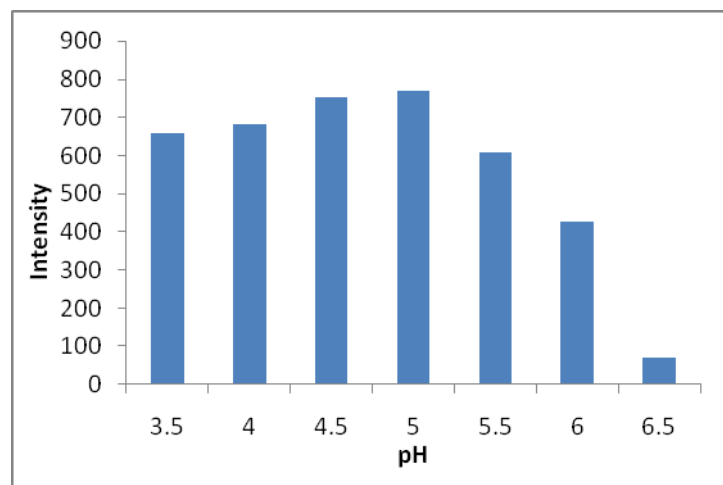

Figure S2. pH analysis of the ABTS SERRS.
